# Supplementary material for: Personalized Technological Support for Informal Caregivers of Older People with Dementia: A Co-Design Approach Involving Potential End Users and Healthcare Professionals in Three Focus Groups in Italy
Source: MDPI journal article supplement (doi:10.3390/healthcare11192640), 2023-09-28
Supplement: s1 [file s1]

### Table S3: Guidance for Reporting Involvement of Patients and the Public (GRIPP2 checklist short form)

Paper: *“Personalized technological supports for informal caregivers of older people with dementia: a co-design approach involving potential end-users and healthcare professionals in three focus groups in Italy”*

| Section and topic                   | Item                                                                                                                                      | Reported on page No |
|-------------------------------------|-------------------------------------------------------------------------------------------------------------------------------------------|---------------------|
| 1: Aim                              | Report the aim of PPI in the study                                                                                                        | 1-3                 |
| 2: Methods                          | Provide a clear description of the methods used for PPI in the study                                                                      | 3-6                 |
| 3: Study results                    | Outcomes—Report the results of PPI in the study, including both positive and negative outcomes                                            | 9-12                |
| 4: Discussion and conclusions       | Outcomes—Comment on the extent to which PPI influenced the study overall. Describe positive and negative effects                          | 14, 18              |
| 5: Reflections/critical perspective | Comment critically on the study, reflecting on the things that went well and those that did not, so others can learn from this experience | 18                  |

PPI=patient and public involvement
